# Supplementary material for: Silver nanoparticles of Albizia adianthifolia: the induction of apoptosis in human lung carcinoma cell line
Source: PubMed Central journal article supplement (PMC3606379; doi:10.1186/1477-3155-11-5), 2013-02-18

# Intracellular staining

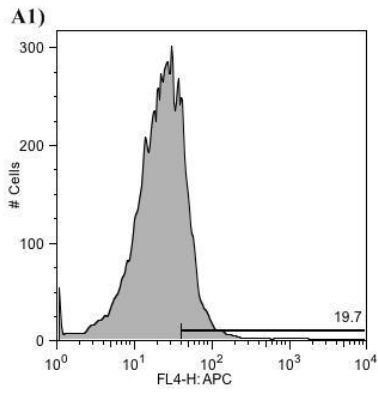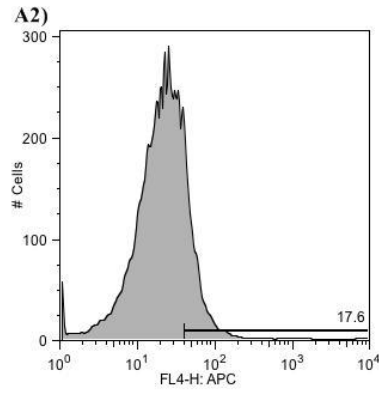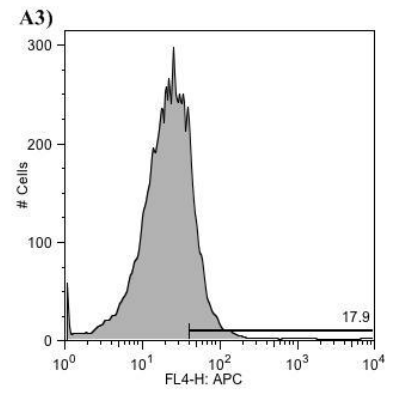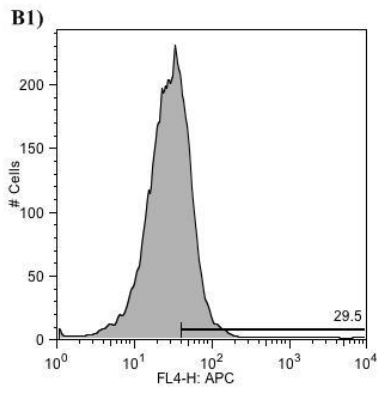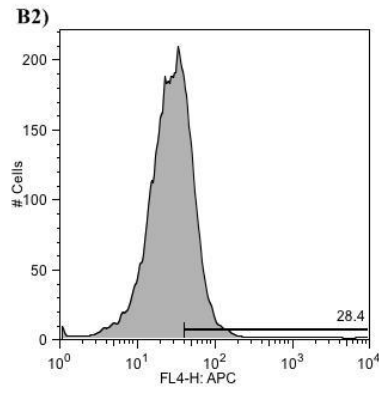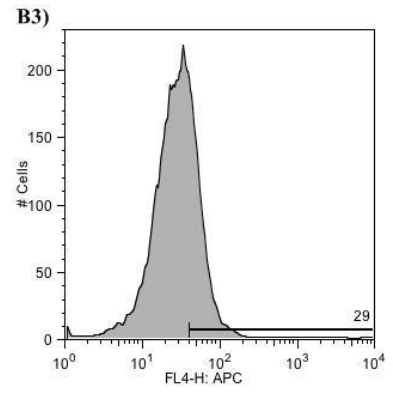

Supplement: 1477-3155-11-5-S2.pdf [file 1477-3155-11-5-S2.pdf]
